# Supplementary material for: Continuous flow system for simple preparation of functionalized polymeric beads from poly(acrylamide-thiolactone)
Source: Royal Society of Chemistry journal article supplement (doi:10.1039/d2py00899h), 2022-01-01
Supplement: d2py00899h1.pdf [file d2py00899h1.pdf]

## Supporting Information

### Continuous flow system for the simple preparation of functionalized polymeric beads from Poly(acrylamide-thiolactone)

David Valverde,<sup>a,b</sup> Raúl Porcar,<sup>\*a,c</sup> Roberta Prinzi,<sup>a</sup> Santiago V. Luis,<sup>a</sup> Belén Altava<sup>a</sup> and Eduardo García-Verdugo<sup>\*a</sup>

<sup>a</sup> Dpto. Química Inorgánica y Orgánica, Universidad Jaume I, Avda. Sos, Baynat s/n, Castellon 12071, Spain. E-mail: cepeda@uji.es

<sup>b</sup> Vicerrectoría de Investigación, UNED, Mercedes de Montes de Oca 11503, Costa Rica

<sup>c</sup> Dpto. Química Orgánica y Bio-Orgánica, Facultad de Ciencias, UNED, Avda. Esparta s/n, 28232. Las Rozas-Madrid, Spain. E-mail: rporcar@ccia.uned.es

#### Table of Contents

|                                                                                                                                     |             |
|-------------------------------------------------------------------------------------------------------------------------------------|-------------|
| <b>Table SI.1.</b> Effect of the concentration on the gelation time.                                                                | <b>p.2</b>  |
| <b>Table SI.2.</b> Effect of the amount of crosslinking agent on the gelation time.                                                 | <b>p.2</b>  |
| <b>Fig. SI.1.</b> General scheme of the reactor for the post-polymerization modification of poly(acrylamide-thiolactone).           | <b>p.3</b>  |
| <b>Fig. SI.2.</b> Functional insoluble polymers obtained by post-polymerization modification of poly(acrylamide-thiolactone).       | <b>p.3</b>  |
| <b>Fig. SI.3.</b> GPC of the polymer <b>1</b> .                                                                                     | <b>p.4</b>  |
| <b>Fig. SI.4.</b> <sup>1</sup> H-NMR spectra of the polymer <b>1</b> .                                                              | <b>p.4</b>  |
| <b>Fig. SI.5.</b> TGA and DSC spectra of the polymer <b>1</b> .                                                                     | <b>p.5</b>  |
| <b>Fig. SI.6.</b> FT-IR-ATR spectra of the polymer <b>1</b> .                                                                       | <b>p.5</b>  |
| <b>Fig. SI.7.</b> Size distribution of the polymer <b>4</b> .                                                                       | <b>p.6</b>  |
| <b>Fig. SI.8.</b> TGA and DSC spectra of the polymer <b>4</b> .                                                                     | <b>p.6</b>  |
| <b>Fig. SI.9.</b> Swelling of the resin <b>4</b> in three different solvents.                                                       | <b>p.7</b>  |
| <b>Fig. SI.10.</b> FT-IR-ATR spectra of the polymer <b>5</b> obtained by chemical modification of <b>4</b> .                        | <b>p.8</b>  |
| <b>Fig. SI.11.</b> FT-IR-ATR spectra of the polymer <b>6</b> obtained by chemical modification of <b>4</b> .                        | <b>p.8</b>  |
| <b>Fig. SI.12.</b> <sup>1</sup> H-NMR spectra of the crude Knoevenagel reaction ( <b>9</b> )                                        | <b>p.9</b>  |
| <b>Fig. SI.13.</b> <sup>1</sup> H-NMR spectra of the crude Henry reaction ( <b>11</b> )                                             | <b>p.9</b>  |
| <b>Video SI.V1. and SI.V2.</b> Droplet generator to afford the corresponding functionalized insoluble polymeric beads ( <b>4</b> ). | <b>p.10</b> |

**Table SI.1.** Effect of the concentration on the gelation time.

| Entry | DMF [ $\mu\text{L}$ ] <sup>a</sup> | 1 [ $\text{mol L}^{-1}$ ] | Inversion test (time/ min) <sup>b</sup> |        |        |
|-------|------------------------------------|---------------------------|-----------------------------------------|--------|--------|
| 1     | 92                                 | 1.114                     | L (0)                                   | L (10) | G (20) |
| 2     | 137                                | 1.026                     | L (0)                                   | L (10) | G (25) |
| 3     | 229                                | 0.884                     | L (0)                                   | L (10) | G (45) |
| 4     | 275                                | 0.826                     | L (0)                                   | L (10) | G (50) |

<sup>a</sup> 0.25 mL of a polymer solution of  $2.34 \text{ mmol mL}^{-1}$  ( $400 \text{ mg mL}^{-1}$ ) in DMF was added to different volumes of DMF containing the same amount of trimethylamine ( $121 \mu\text{L}$ , PAHT (1):Et<sub>3</sub>N, 1:1.5 molar ratio), 3-(dimethylamino)-1-propylamine (DMAPA, 2,  $55 \mu\text{L}$ , PAHT:2, 1:1.34 molar ratio) and 1,5-diaminopentane (3,  $7 \mu\text{L}$ , PAHT:3, 5:1 molar ratio). 40 % mol crosslinking. <sup>b</sup> Vial inversion test L: liquid, G: gel, the time for each vial inversion test is provided in brackets.

**Table SI.2.** Effect of the amount of crosslinking agent on the gelation time.<sup>a</sup>

| Entry | 2+3:1 | 1:3   | Molar ratio crosslinking | 1 [M] | Inversion test (time/ min) <sup>b</sup> |        |          |
|-------|-------|-------|--------------------------|-------|-----------------------------------------|--------|----------|
| 1     | 1.49  | 0.00  | 0                        | 0.69  | L (0)                                   | L (0)  | L (24 h) |
| 2     | 1.64  | 13.76 | 15                       | 0.69  | L (0)                                   | L (10) | G (24 h) |
| 3     | 1.69  | 10.12 | 20                       | 0.69  | L (0)                                   | L (10) | G (24 h) |
| 4     | 4.49  | 0.67  | 299                      | 0.69  | G (0)                                   | -      | -        |
| 5     | 2.49  | 2.00  | 100                      | 0.69  | L (0)                                   | G (2)  | /        |
| 6     | 2.09  | 3.34  | 60                       | 0.69  | L (0)                                   | G (3)  | /        |
| 7     | 1.90  | 4.98  | 40                       | 0.69  | L (0)                                   | G (10) | /        |

<sup>a</sup> To 0.25 mL of a polymer solution of  $1.17 \text{ mmol mL}^{-1}$  ( $200 \text{ mg mL}^{-1}$ ) in DMF was added the same amount of trimethylamine ( $121 \mu\text{L}$ , PAHT (1):Et<sub>3</sub>N, 1:3 molar ratio), 3-(dimethylamino)-1-propylamine (DMAPA, 2,  $55 \mu\text{L}$ , PAHT (1):2, 1:1.5 molar ratio) and a variable volume of 1,5-diaminopentane (3). <sup>b</sup> Using the vial inversion test L: liquid, G: gel.

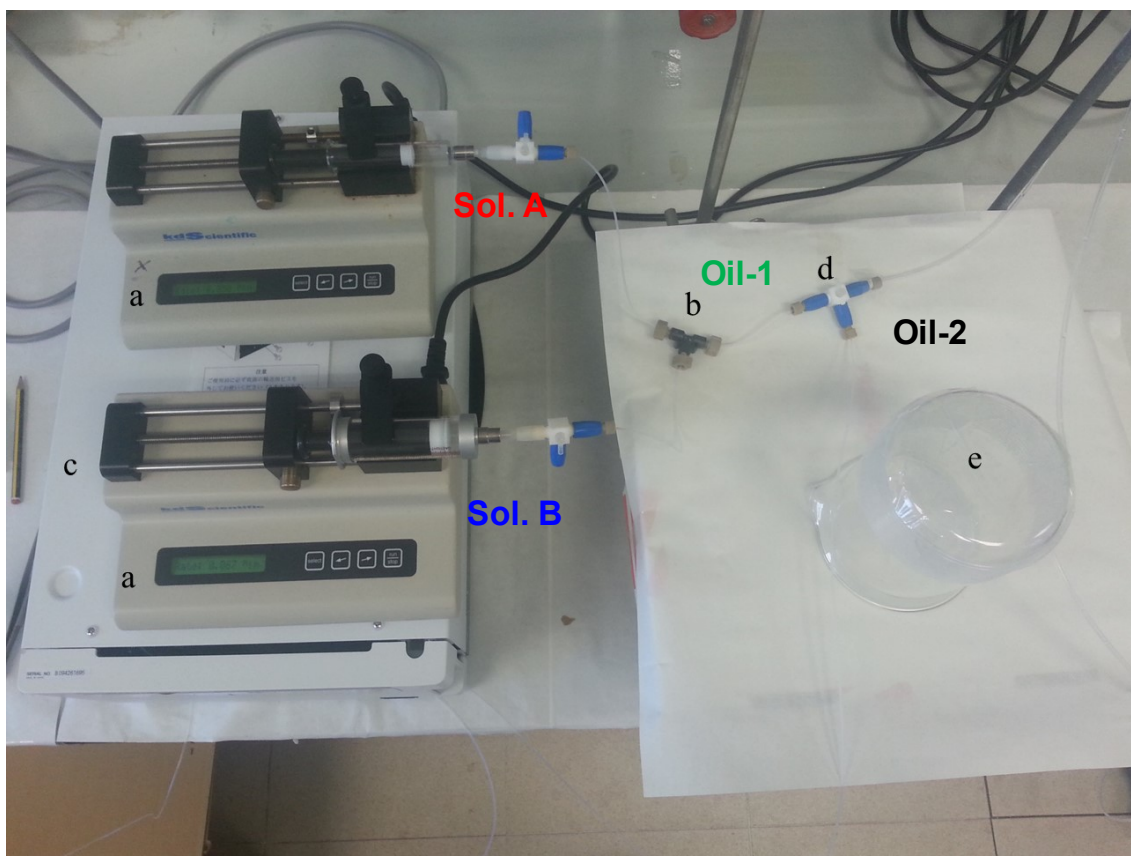

**Fig. SI.1.** General scheme of reactor for the post-polymerization modification of **1** to obtain beads of polymer **4** in flow. **a**: syringe pumps, **b**: T-piece connection to mix solution A (polymer solution) Solution B (modifiers solutions), **c**: HPLC pump, **d**: generator droplets, **e**: residence unit (reactor).

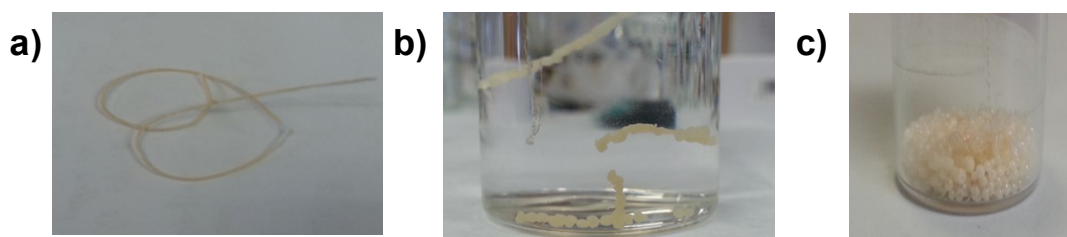

**Fig. SI.2.** Functional insoluble polymers obtained by post-polymerization modification of **1**. **(a)** Obtained with the conditions reported in Table 1, Entry 3. **(b)** Obtained with the conditions reported in Table 1, Entry 4. **(c)** Obtained with the conditions reported in Table 1, Entry 6.

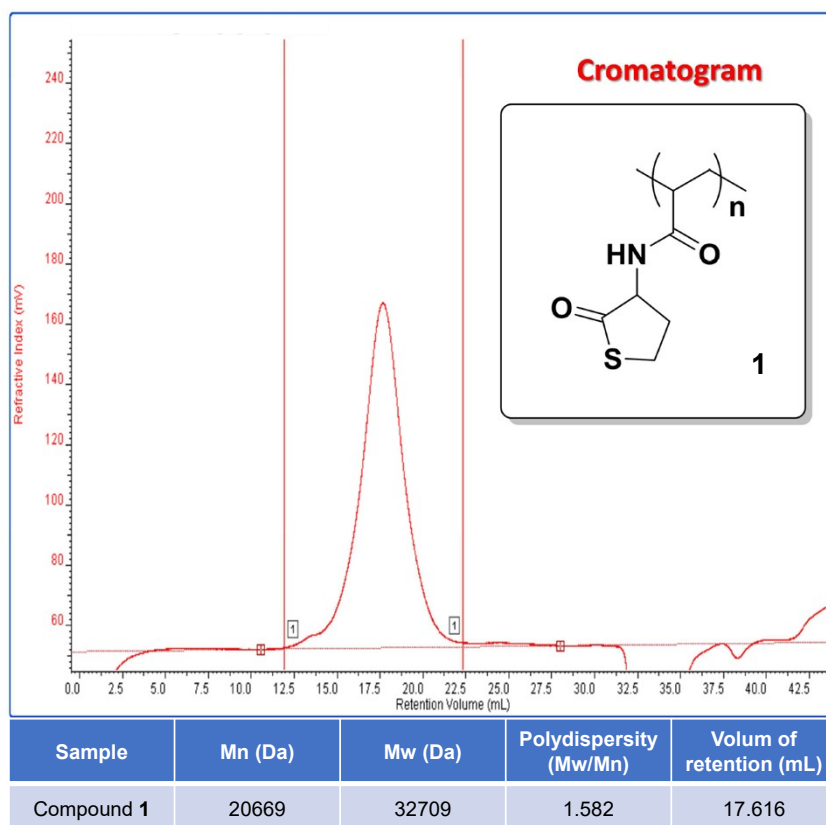

**Fig. SI.3.** Size exclusion chromatography obtained for **1** in DMF (8 mg/mL) and 0.1% (w/w) of LiBr.

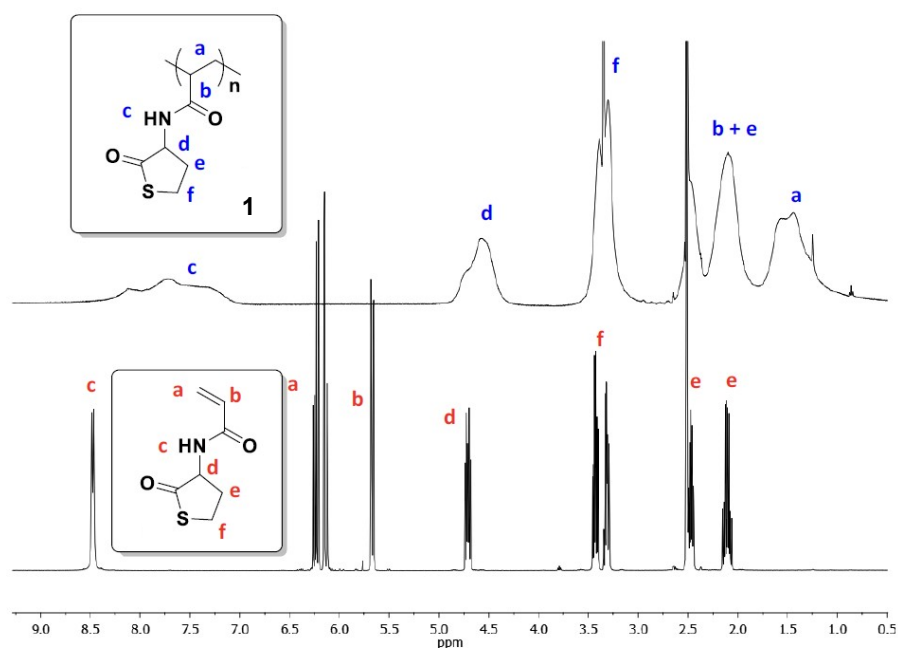

**Fig. SI.4.** Comparison of the  $^1\text{H}$ -NMR spectra for the acryloyl homocysteine thiolactone and the related homopolymer **1** obtained by RAFT polymerization.

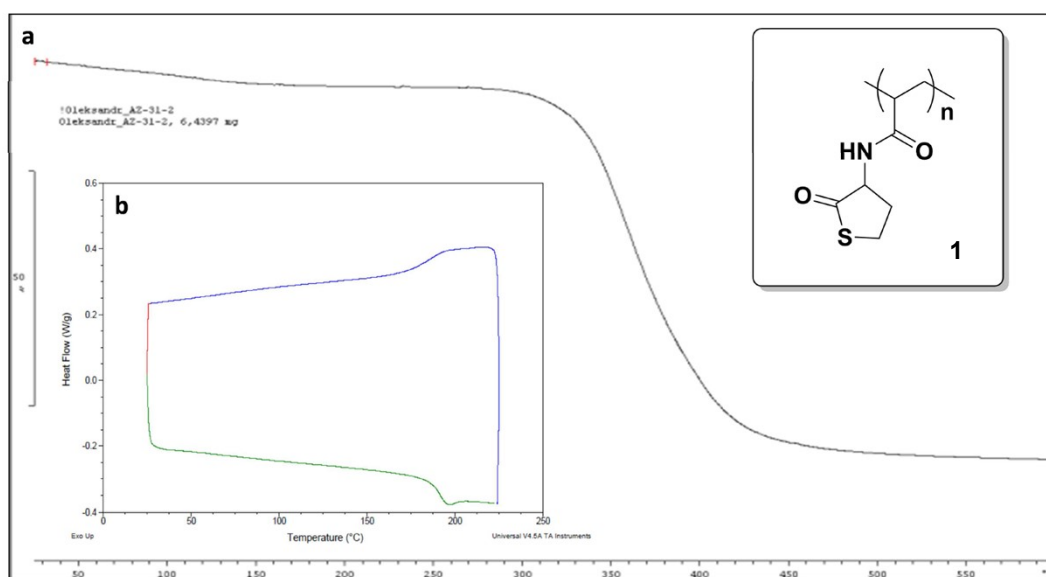

**Fig. SI.5. a:** TGA spectra obtained from 25 to 600 °C for **1**. **b:** DSC spectra obtained for **1** between 195 and 200 °C.

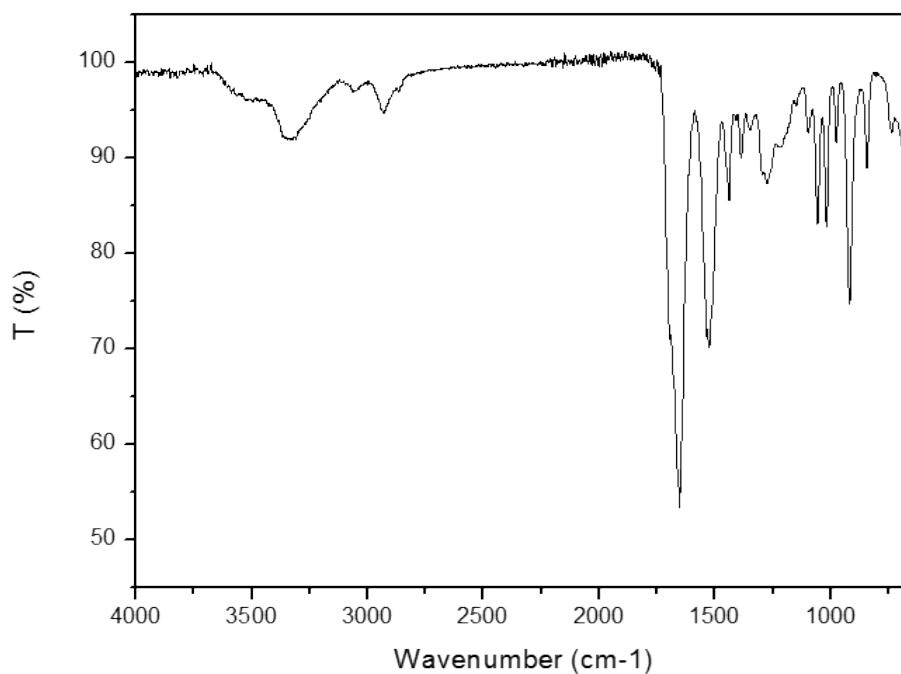

**Fig. SI.6.** FT-IR-ATR spectra of the polymer **1**.

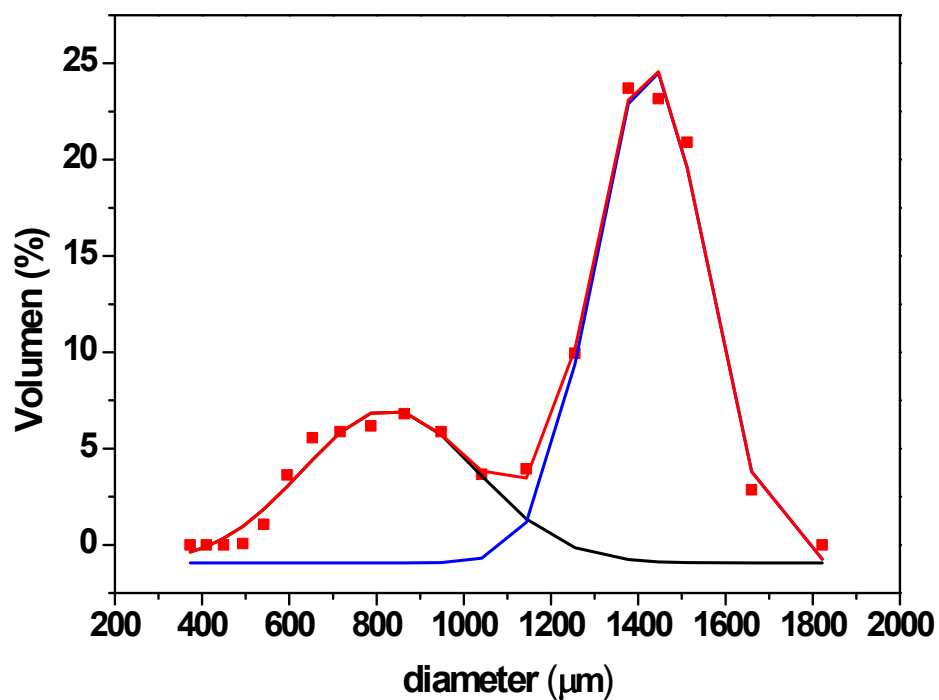

Fig. SI.7. Size distribution of the polymer 4 obtained using a Coulter counter system.

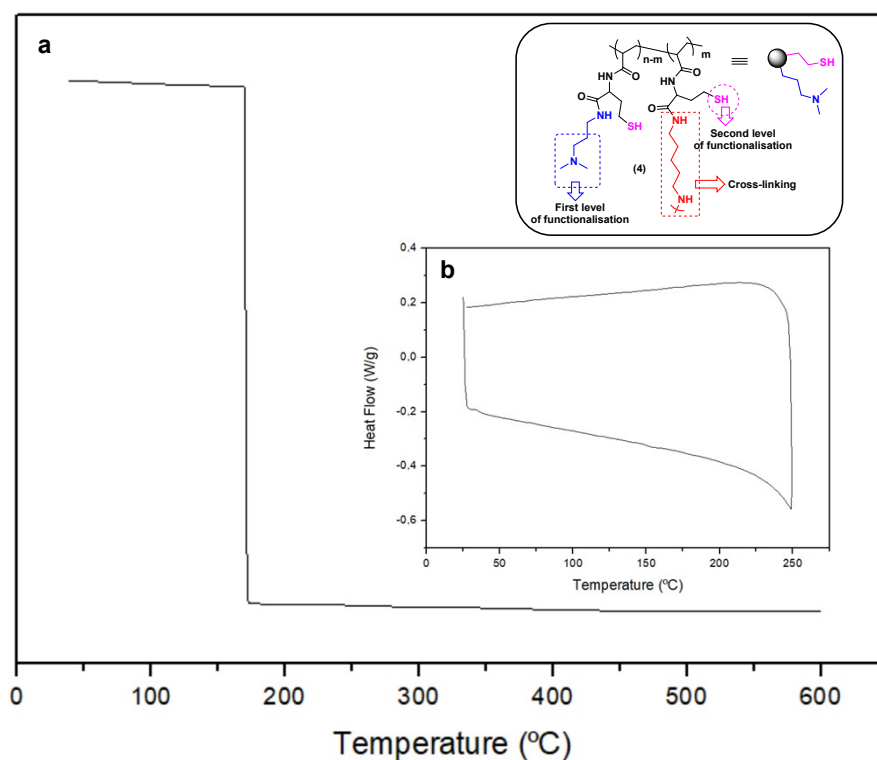

Fig. SI.8. a: TGA spectra obtained from 25 to 600 °C for 4. b: DSC spectra obtained for 4 between 25 and 250 °C.

### Syringe method for the swelling test

The swelling properties of the polymers were measured by the syringe method. A syringe was loaded with a known amount (typically 100 mg) of the polymer, and the volume of the dry polymer was recorded ( $b$  mL).  $\text{H}_2\text{O}$ , MeOH or  $\text{CH}_2\text{Cl}_2$  was added to the syringe, and the mixture was let to stand at room temperature to reach equilibrium. The extra solvent was removed from the syringe by using a plunger, and the volume of the swollen polymer was recorded ( $c$  mL). The swelling volume ( $\text{mL g}^{-1}$ ) was estimated as the volume of solvent in the swollen polymer ( $c-b$  mL) divided by the weight of the used polymer.

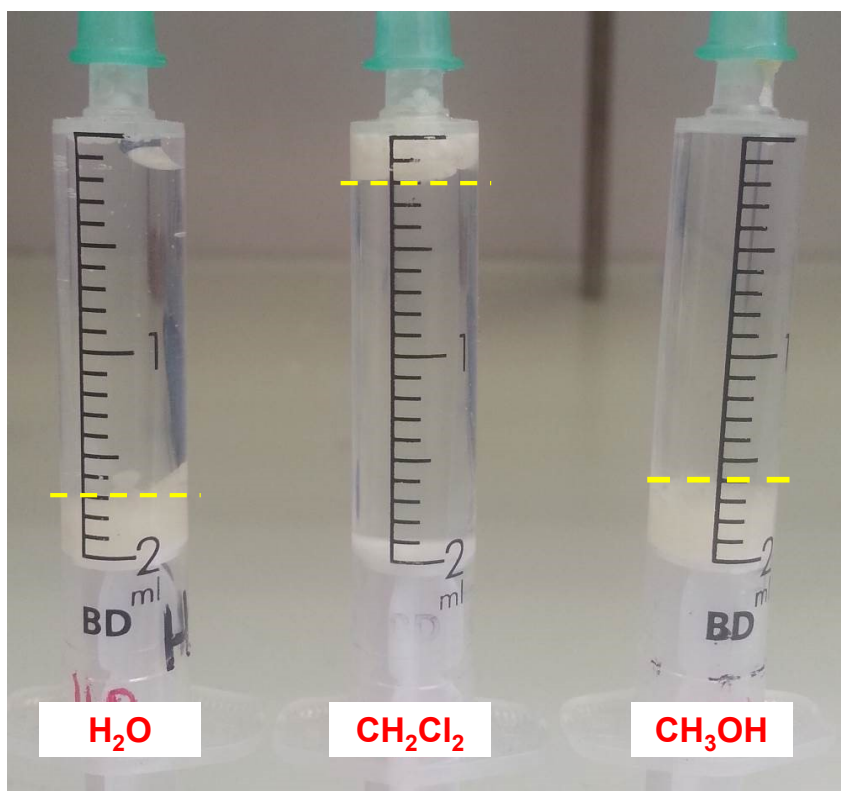

Fig. SI.9. Swelling of the resin 4 in three different solvents.

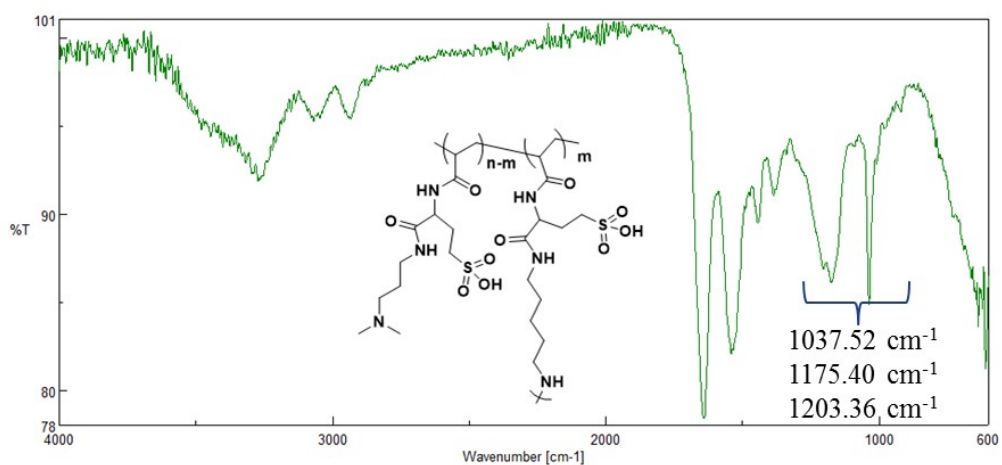

**Fig. SI.10.** FT-IR-ATR spectra of the polymer **5** obtained by chemical modification of **4**.

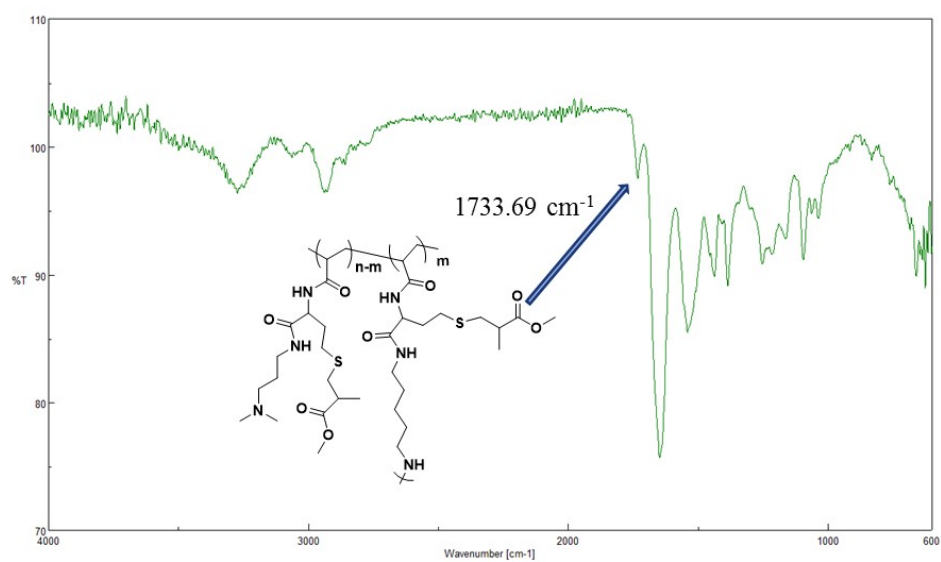

**Fig. SI.11.** FT-IR-ATR spectra of the polymer **6** obtained by chemical modification of **4**.



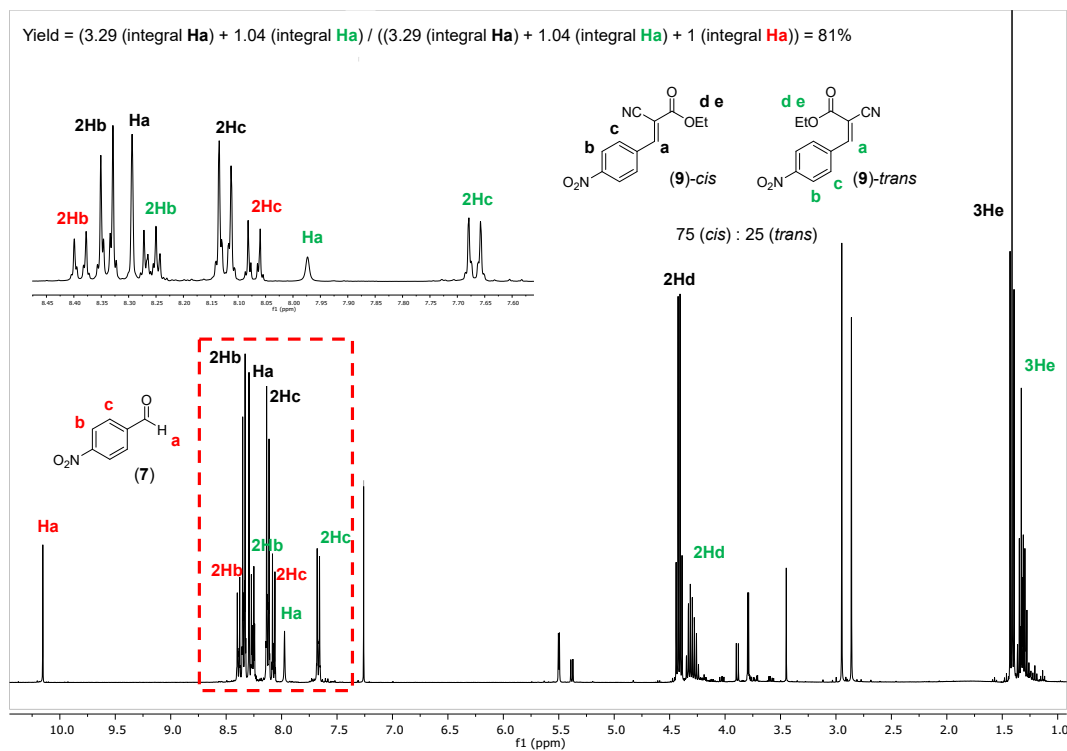

Fig. SI.12.  $^1\text{H}$ -NMR spectra of the crude Knoevenagel reaction (9) in DMC ( $\text{CDCl}_3$ ).

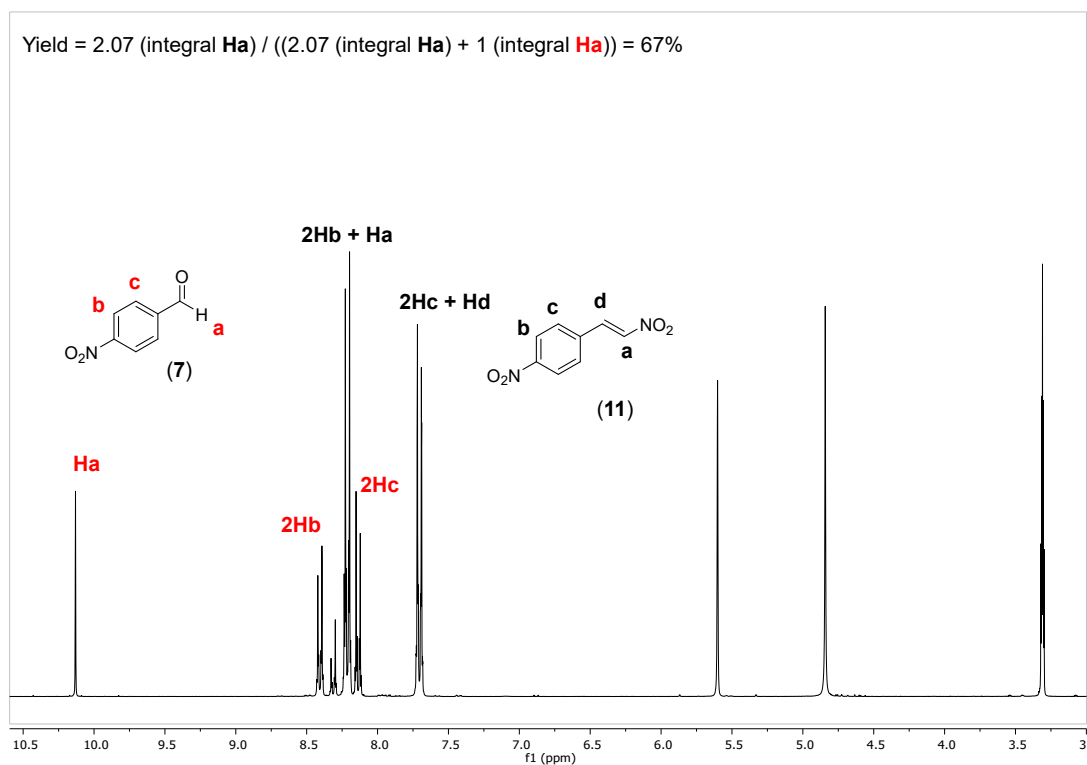

Fig. SI.13.  $^1\text{H}$ -NMR spectra of the crude Henry reaction (11) in DMC ( $\text{CD}_3\text{OD}$ ).

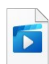

Video\_SI.V1.mp4

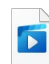

Video\_SI.V2.mp4

**Video SI.V1. and SI.V2.** Droplet generator to afford the corresponding functionalized insoluble polymeric beads (**4**). Droplets generated by the phase-phase system.
